# Supplementary material for: Amphibians and Reptiles Associated With Urban and Peri-urban Landscapes in the Central Andes of Colombia
Source: Research Square preprint supplement (doi:10.21203/rs.3.rs-7464640/v1), 2025-09-09
Supplement: Supplementary file 1 [file 342b65b509082affb1b18c48.docx]

**Supplementary materials**

**Title**

Amphibians and reptiles associated with urban and peri-urban landscapes in the Central Andes of Colombia

**Author information**

Erika Alejandra Cardona-Galvis1,2, Jose J. Henao-Osorio2,3, L. Santiago Caicedo-Martínez2, Héctor F. Árias-Monsalve2,4, Julián A. Rojas-Morales2,3,5, Héctor E. Ramírez-Chaves2,3

1 Maestría en Ciencias Biológicas, Departamento de Ciencias Biológicas, Facultad de Ciencias Exactas y Naturales, Universidad de Caldas, Manizales, Colombia.

2 Integrative Zoological Biodiversity Discovery Laboratory, Centro de Museos, Museo de Historia Natural, Universidad de Caldas, Manizales, Colombia.

3 Grupo de Investigación en Genética, Biodiversidad y Manejo de Ecosistemas (GEBIOME), Departamento de Ciencias Biológicas, Facultad de Ciencias Exactas y Naturales, Universidad de Caldas, y Centro de Museos, Museo de Historia Natural, Universidad de Caldas, Calle 65 No 26-10, Manizales, Caldas, Colombia.

4 La Corporación para el Desarrollo de Caldas, Manizales, Colombia.

5 Doctorado en Ciencias, Departamento de Ciencias Biológicas, Facultad de Ciencias Exactas y Naturales, Universidad de Caldas, Manizales, Colombia.

*** Corresponding author:**

Erika Alejandra Cardona-Galvis, ecardonagalvis@gmail.com, https://orcid.org/0000-0002-4644-3662

Héctor E. Ramírez-Chaves, hector.ramirez@ucaldas.edu.co, https://orcid.org/0000-0002-2454-9482

**Table S1.**

Abundance and richness of amphibians and reptiles recorded during fieldwork in Ecoparks and areas of environmental interest in Manizales, Caldas, Colombia.

| **Taxon** | **Los Yarumos** | **Los Alcázares-Arenillo** | **Bosque Popular el Prado** | **Jardín Botánico** | **Monteleón** | **Cerro Sancancio** | **Total** |
| --- | --- | --- | --- | --- | --- | --- | --- |
| **Amphibia** |  |  |  |  |  |  |  |
| **Anura** |  |  |  |  |  |  |  |
| **Dendrobatidae** |  |  |  |  |  |  |  |
| *Leucostethus aff. fraterdanieli* | 1 | 18 | 1 | 7 | 1 | 4 | 32 |
| **Hemiphractidae** |  |  |  |  |  |  |  |
| *Gastrotheca nicefori* | 4 |  |  |  |  |  | 4 |
| **Hylidae** |  |  |  |  |  |  |  |
| *Dendropsophus columbianus* |  | 3 |  | 5 |  | 4 | 12 |
| **Strabomantidae** |  |  |  |  |  |  |  |
| *Pristimantis achatinus* |  | 34 | 12 | 3 |  | 3 | 52 |
| *Pristimantis erythropleura* |  |  |  |  |  | 1 | 1 |
| *Pristimantis paisa* | 3 | 7 | 2 | 12 | 1 | 3 | 28 |
| *Pristimantis thectopternus* | 32 |  | 22 | 3 | 8 | 37 | 102 |
| **Species richness of amphibians** | 4 | 4 | 4 | 5 | 3 | 6 |  |
| **Reptilia** |  |  |  |  |  |  |  |
| **Squamata** |  |  |  |  |  |  |  |
| **Sauria** |  |  |  |  |  |  |  |
| **Gekkonidae** |  |  |  |  |  |  |  |
| *Lepidoblapharis duolepis* |  | 8 |  |  |  |  | 8 |
| *Lepidoblepharis williamsi* |  |  |  | 6 |  |  | 6 |
| **Gymnophthalmidae** |  |  |  |  |  |  |  |
| *Pholidobolus marianus* | 2 | 4 | 2 | 7 | 2 | 6 | 23 |
| *Riama columbiana* |  |  |  |  | 2 |  | 2 |
| **Anolidae** |  |  |  |  |  |  |  |
| *Anolis antonii* | 1 | 7 |  | 1 |  |  | 9 |
| *Anolis ventrimaculatus* |  |  |  |  |  | 3 | 3 |
| **Serpentes** |  |  |  |  |  |  |  |
| **Colubridae** |  |  |  |  |  |  |  |
| *Atractus biseriatus* |  |  |  | 1 |  |  | 1 |
| *Atractus lehmanni* | 3 | 2 |  |  |  | 1 | 6 |
| *Erythrolamprus epinephelus* |  |  |  |  |  | 1 | 1 |
| **Viperidae** |  |  |  |  |  |  |  |
| *Bothriechis schlegelii* |  | 1 |  |  |  |  | 1 |
| **Species richness of reptiles** | 3 | 5 | 1 | 4 | 2 | 4 |  |
| **Speces richness total** | 7 | 9 | 5 | 9 | 5 | 10 |  |
| **Total individuals per site** | 46 | 84 | 39 | 45 | 14 | 63 | 291 |

**Table S2.**

Observed species richness and completeness of sampling of amphibians and reptiles by study site.

|  | Amphibians | | | Reptiles | | |
| --- | --- | --- | --- | --- | --- | --- |
| Site | **n** | **S.obs** | **SC** | **n** | **S.obs** | **SC** |
| 1 | 30 | 5 | 1.0000 | 15 | 4 | 0.8833 |
| 2 | 37 | 4 | 0.9744 | 2 | 1 | 1.0000 |
| 3 | 52 | 6 | 1.0000 | 11 | 4 | 0.8485 |
| 4 | 62 | 4 | 1.0000 | 22 | 5 | 0.9585 |
| 5 | 40 | 4 | 1.0000 | 6 | 3 | 0.8810 |
| 6 | 10 | 3 | 0.8364 | 4 | 2 | 1.0000 |

**Table S3.**

Species richness, abundance, density, and dominance of each Ecopark and area of environmental interest evaluated in Manizales, Caldas, Colombia.

| **Site** | **Richness (N° species)** | **Abundance** | **Area (km^2)** | **Richness density (esp/km^2)** | **Dominant species (Highest relative abundance)** | **% Dominance** |
| --- | --- | --- | --- | --- | --- | --- |
| **Los Yarumos** | 7 | 46 | 0.358 | 19.55 | *Pristimantis thectopternus* | 69.57% |
| **Los Alcázares-Arenillo** | 9 | 84 | 0.357 | 25.21 | *Leucostethus* aff. *fraterdanieli* | 21.43% |
| *Pristimantis achatinus* | 40.48% |
| **Bosque Popular el Prado** | 5 | 39 | 0.227 | 22.03 | *Pristimantis achatinus* | 30.77% |
| *Pristimantis thectopternus* | 56.41% |
| **Jardín Botánico** | 9 | 45 | 0.07 | 128.57 | *Leucostethus* aff. *fraterdanieli* | 15.56% |
| *Pholidobolus marianus* | 15.56% |
| *Pristimantis paisa* | 26.67% |
| **Monteleón** | 5 | 14 | 0.259 | 19.31 | *Pristimantis thectopternus* | 57.14% |
| **Cerro Sancancio** | 10 | 63 | 0.74 | 13.51 | *Pristimantis thectopternus* | 58.73% |
